# Supplementary material for: Provision of a New Method to Improve the Detection of Micro Seismic Events
Source: Preprints.org preprint supplement (doi:10.20944/preprints201708.0071.v1), 2017-08-21
Supplement: Supplementary file 2 [file supplementary]

Warmest Greeting

Dear Editor-in chief

Here by i declare that my manuscript is new and original research about micro seismic events.
Researchers believe there are many important seismic events which lost as noise in seismic networks. Other side as you know one of the most important process in seismic data mining is classification, so i have created a new mechanism for this task by new hybrid model of detection& classification.

I hope my manuscript could be considerable for you.

Best regards

Saeed Ghorbani
